# Supplementary material
Source: PubMed Central journal article supplement (PMC3641798)
Supplement: supp_cwt007_cwt007supp_table1.pdf [file supp_cwt007_cwt007supp_table1.pdf]

|    | RT   | Mass   | Hex | HexNAc | Fuc | NeuAc | NeuGc | Intensity | Relative Intensity | Structure                                                                             | Ref   |
|----|------|--------|-----|--------|-----|-------|-------|-----------|--------------------|---------------------------------------------------------------------------------------|-------|
| 1  | 1.78 | 490.19 | 2   | 0      | 1   | 0     | 0     | 5655      | 0.46               | 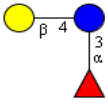   | 1,2   |
| 2  | 12.6 | 490.19 | 2   | 0      | 1   | 0     | 0     | 7215      | 0.59               |    | 3     |
| 3  | 15.3 | 506.18 | 3   | 0      | 0   | 0     | 0     | 11441     | 0.94               |    | 4,5,6 |
| 4  | 12.3 | 506.18 | 3   | 0      | 0   | 0     | 0     | 25270     | 2.07               |    | 4,5,6 |
| 5  | 11.7 | 506.18 | 3   | 0      | 0   | 0     | 0     | 79632     | 6.52               |    | 4,5,6 |
| 6  | 9.97 | 506.18 | 3   | 0      | 0   | 0     | 0     | 244882    | 20.05              |  | 4,5,6 |
| 7  | 12   | 547.21 | 2   | 1      | 0   | 0     | 0     | 1354      | 0.11               |  |       |
| 8  | 11.2 | 547.21 | 2   | 1      | 0   | 0     | 0     | 11027     | 0.90               |  | 7     |
| 9  | 10.5 | 547.21 | 2   | 1      | 0   | 0     | 0     | 1514      | 0.12               |  |       |
| 10 | 13.5 | 547.21 | 2   | 1      | 0   | 0     | 0     | 3880      | 0.32               |  |       |

|    |      |        |   |   |   |   |   |        |       |                                                                                       |        |
|----|------|--------|---|---|---|---|---|--------|-------|---------------------------------------------------------------------------------------|--------|
| 11 | 15.7 | 547.21 | 2 | 1 | 0 | 0 | 0 | 2193   | 0.18  |    |        |
| 12 | 9.64 | 547.21 | 2 | 1 | 0 | 0 | 0 | 74141  | 6.07  |    | 8      |
| 13 | 14.4 | 547.21 | 2 | 1 | 0 | 0 | 0 | 805    | 0.07  |    |        |
| 14 | 13.3 | 635.23 | 2 | 0 | 0 | 1 | 0 | 27605  | 2.26  |    | 7,9,10 |
| 15 | 19.8 | 635.23 | 2 | 0 | 0 | 1 | 0 | 251914 | 20.63 |    | 7,9,10 |
| 16 | 19.3 | 651.22 | 2 | 0 | 0 | 0 | 1 | 35974  | 2.95  |  | 7,10   |
| 17 | 13.3 | 652.24 | 3 | 0 | 1 | 0 | 0 | 3643   | 0.30  |  |        |
| 18 | 19.9 | 652.24 | 3 | 0 | 1 | 0 | 0 | 14541  | 1.19  |  |        |
| 19 | 12.4 | 668.24 | 4 | 0 | 0 | 0 | 0 | 4329   | 0.35  |  |        |
| 20 | 15.3 | 668.24 | 4 | 0 | 0 | 0 | 0 | 2410   | 0.20  |  |        |

|    |      |        |   |   |   |   |   |        |       |  |    |
|----|------|--------|---|---|---|---|---|--------|-------|--|----|
| 21 | 11.5 | 668.24 | 4 | 0 | 0 | 0 | 0 | 1089   | 0.09  |  |    |
| 22 | 19.3 | 668.24 | 4 | 0 | 0 | 0 | 0 | 6013   | 0.49  |  |    |
| 23 | 13   | 676.25 | 1 | 1 | 0 | 1 | 0 | 230151 | 18.84 |  | 7  |
| 24 | 14.6 | 676.25 | 1 | 1 | 0 | 1 | 0 | 2301   | 0.19  |  | 11 |
| 25 | 12.7 | 692.25 | 1 | 1 | 0 | 0 | 1 | 18273  | 1.50  |  | 9  |
| 26 | 10.4 | 693.27 | 2 | 1 | 1 | 0 | 0 | 1971   | 0.16  |  |    |
| 27 | 9.7  | 709.26 | 3 | 1 | 0 | 0 | 0 | 1265   | 0.10  |  | 12 |
| 28 | 13.5 | 709.26 | 3 | 1 | 0 | 0 | 0 | 485    | 0.04  |  |    |
| 29 | 10.8 | 709.26 | 3 | 1 | 0 | 0 | 0 | 1923   | 0.16  |  |    |
| 30 | 15.5 | 709.26 | 3 | 1 | 0 | 0 | 0 | 1659   | 0.14  |  |    |

|    |      |        |   |   |   |   |   |       |      |                                                                                       |     |
|----|------|--------|---|---|---|---|---|-------|------|---------------------------------------------------------------------------------------|-----|
| 31 | 12.2 | 709.26 | 3 | 1 | 0 | 0 | 0 | 47788 | 3.91 | 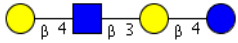   | 7,8 |
| 32 | 11.3 | 709.26 | 3 | 1 | 0 | 0 | 0 | 1800  | 0.15 |    | 7,8 |
| 33 | 14.4 | 709.26 | 3 | 1 | 0 | 0 | 0 | 986   | 0.08 |    |     |
| 34 | 14.8 | 750.29 | 2 | 2 | 0 | 0 | 0 | 3708  | 0.30 |    |     |
| 35 | 14.1 | 750.29 | 2 | 2 | 0 | 0 | 0 | 5278  | 0.43 |    |     |
| 36 | 22.5 | 797.28 | 3 | 0 | 0 | 1 | 0 | 3918  | 0.32 |  | 13  |
| 37 | 10   | 830.29 | 5 | 0 | 0 | 0 | 0 | 897   | 0.07 |  |     |
| 38 | 14   | 838.31 | 2 | 1 | 0 | 1 | 0 | 4926  | 0.40 |  |     |
| 39 | 11.4 | 855.32 | 3 | 1 | 1 | 0 | 0 | 3058  | 0.25 |  |     |
| 40 | 18.8 | 871.32 | 4 | 1 | 0 | 0 | 0 | 4129  | 0.34 |  | 7,8 |

|    |      |        |   |   |   |   |   |       |      |                                                                                       |     |
|----|------|--------|---|---|---|---|---|-------|------|---------------------------------------------------------------------------------------|-----|
| 41 | 16.4 | 871.32 | 4 | 1 | 0 | 0 | 0 | 22953 | 1.88 |     | 7,8 |
| 42 | 15.1 | 912.34 | 3 | 2 | 0 | 0 | 0 | 15604 | 1.28 |    |     |
| 43 | 14.3 | 912.34 | 3 | 2 | 0 | 0 | 0 | 1124  | 0.09 |    |     |
| 44 | 22.4 | 1000.4 | 3 | 1 | 0 | 1 | 0 | 1119  | 0.09 |    |     |
| 45 | 14.3 | 1017.4 | 4 | 1 | 1 | 0 | 0 | 1670  | 0.14 |    |     |
| 46 | 18.7 | 1033.4 | 5 | 1 | 0 | 0 | 0 | 2496  | 0.20 |  |     |
| 47 | 13.8 | 1058.4 | 3 | 2 | 1 | 0 | 0 | 2422  | 0.20 |  |     |
| 48 | 19.4 | 1074.4 | 4 | 2 | 0 | 0 | 0 | 11799 | 0.97 |  | 7   |
| 49 | 17.7 | 1115.4 | 3 | 3 | 0 | 0 | 0 | 9861  | 0.81 |  |     |
| 50 | 13   | 1365.5 | 4 | 2 | 0 | 1 | 0 | 1222  | 0.10 |  |     |

References for supplementary Table 1

- 1.) (Kuhn, et al. 1956)
- 2.) (Mariño, et al. 2011)
- 3.) (Montreuil 1956)
- 4.) (Chaturvedi and Sharma 1988)
- 5.) (Urashima, et al. 2001)
- 6.) (Saito, et al. 1987)
- 7.) (Urashima, et al. 1989)
- 8.) (Urashima, et al. 1991)
- 9.) (Kuhn and Brossmer 1959)
- 10) (Veh, et al. 1981)
- 11) (Urashima, et al. 1997)
- 12) (Kuhn and Gauhe 1962)
- 13) (Parkkinen and Finne 1987)
